# Supplementary material for: Gastric Cancer in Older Patients: A Retrospective Study and Literature Review
Source: PubMed Central journal article supplement — Ann Geriatr Med Res. 2022 Mar 18;26(1):33–41. doi: 10.4235/agmr.21.0144 (PMC8984166; doi:10.4235/agmr.21.0144), 2022-03-18
Supplement: agmr-21-0144-suppl1.pdf [file agmr-21-0144-suppl1.pdf]

**Table S1.** Pathological characteristics of each group according to sex

|                        | Group I (young, < 65 y) |                  | Group II (early-old, 65–74 y) |                  | Group III (old, ≥ 75 y) |                  | p-value <sup>a)</sup> | p-value <sup>b)</sup> |
|------------------------|-------------------------|------------------|-------------------------------|------------------|-------------------------|------------------|-----------------------|-----------------------|
|                        | Male (n = 1,113)        | Female (n = 567) | Male (n = 635)                | Female (n = 284) | Male (n = 257)          | Female (n = 127) |                       |                       |
| Cancer type            |                         |                  |                               |                  |                         |                  | 0.946                 | 0.085                 |
| EGC                    | 800 (71.9)              | 419 (73.9)       | 452 (71.2)                    | 192 (67.6)       | 185 (72.0)              | 85 (66.9)        |                       |                       |
| AGC                    | 313 (28.1)              | 148 (26.1)       | 183 (28.8)                    | 92 (32.4)        | 72 (28.0)               | 42 (33.1)        |                       |                       |
| Lauren histologic type |                         |                  |                               |                  |                         |                  | < 0.001*              | < 0.001*              |
| Intestinal             | 679 (61.0)              | 177 (31.2)       | 507 (79.8)                    | 180 (63.4)       | 210 (81.7)              | 90 (70.9)        |                       |                       |
| Diffuse                | 380 (34.1)              | 369 (65.1)       | 101 (15.9)                    | 93 (32.7)        | 39 (15.2)               | 32 (25.2)        |                       |                       |
| Mixed                  | 54 (4.9)                | 21 (3.7)         | 27 (4.3)                      | 11 (3.9)         | 8 (3.1)                 | 5 (3.9)          |                       |                       |
| Location of tumor      |                         |                  |                               |                  |                         |                  | 0.001*                | < 0.001*              |
| Upper                  | 25 (2.2)                | 11 (1.9)         | 17 (2.7)                      | 5 (1.8)          | 16 (6.2)                | 3 (2.4)          |                       |                       |
| Middle                 | 491 (44.1)              | 337 (59.4)       | 253 (39.8)                    | 120 (42.2)       | 91 (35.4)               | 40 (31.5)        |                       |                       |
| Lower                  | 597 (53.6)              | 219 (38.6)       | 365 (57.5)                    | 159 (56.0)       | 150 (58.4)              | 84 (66.1)        |                       |                       |
| Node metastasis        |                         |                  |                               |                  |                         |                  | 0.560                 | 0.323                 |
| Negative               | 833 (74.8)              | 412 (72.7)       | 489 (77.0)                    | 200 (70.4)       | 197 (76.7)              | 84 (66.1)        |                       |                       |
| Positive               | 280 (25.2)              | 155 (27.3)       | 146 (23.0)                    | 84 (29.6)        | 60 (23.3)               | 43 (33.9)        |                       |                       |
| Cancer stage           |                         |                  |                               |                  |                         |                  | 0.783                 | 0.477                 |
| I                      | 871 (78.2)              | 439 (77.4)       | 496 (78.1)                    | 215 (75.7)       | 202 (78.6)              | 89 (70.1)        |                       |                       |
| II                     | 140 (12.6)              | 85 (15.0)        | 87 (13.7)                     | 42 (14.8)        | 27 (10.5)               | 24 (18.9)        |                       |                       |
| III                    | 79 (7.1)                | 33 (5.8)         | 42 (6.6)                      | 24 (8.4)         | 22 (8.6)                | 12 (9.4)         |                       |                       |
| IV                     | 23 (2.1)                | 10 (1.8)         | 10 (1.6)                      | 3 (1.1)          | 6 (2.3)                 | 2 (1.6)          |                       |                       |
| p53 overexpression     |                         |                  |                               |                  |                         |                  | 0.057                 | 0.058                 |
| Negative               | 697 (62.6)              | 420 (74.1)       | 361 (56.9)                    | 190 (66.9)       | 153 (59.5)              | 96 (75.6)        |                       |                       |
| Positive               | 416 (37.4)              | 147 (25.9)       | 274 (43.1)                    | 94 (33.1)        | 104 (40.5)              | 31 (24.4)        |                       |                       |

Values are presented as number (%).

EGC, early gastric cancer; AGC, advanced gastric cancer.

<sup>a)</sup> Among males and <sup>b)</sup> among females (using a stratified chi-square test).

\*p<0.05.
