# Supplementary material for: Gastric Cancer in Older Patients: A Retrospective Study and Literature Review
Source: PubMed Central journal article supplement — Ann Geriatr Med Res. 2022 Mar 18;26(1):33–41. doi: 10.4235/agmr.21.0144 (PMC8984166; doi:10.4235/agmr.21.0144), 2022-03-18
Supplement: agmr-21-0144-suppl2.pdf [file agmr-21-0144-suppl2.pdf]

**Table S2.** Comparison of characteristics between those with cardia and non-cardia cancers

|                                  | Cardia   | Non-cardia   | Total | p-value |
|----------------------------------|----------|--------------|-------|---------|
| Age (y)                          |          |              |       | 0.015*  |
| Group I (< 65)                   | 24 (1.4) | 1,656 (98.6) | 1,680 |         |
| Group II (65–74)                 | 18 (2.0) | 901 (98.0)   | 919   |         |
| Group III (≥ 75)                 | 14 (3.6) | 370 (97.4)   | 384   |         |
| Alcohol consumption              |          |              |       | 0.918   |
| No                               | 31 (1.9) | 1,600 (98.1) | 1,631 |         |
| Yes                              | 25 (1.8) | 1,327 (98.2) | 1,352 |         |
| Smoking                          |          |              |       | 0.610   |
| No                               | 29 (1.8) | 1,616 (98.2) | 1,645 |         |
| Yes                              | 27 (2.0) | 1,311 (98.0) | 1,338 |         |
| Family history of gastric cancer |          |              |       | 0.237   |
| No                               | 43 (1.7) | 2,424 (98.3) | 2,467 |         |
| Yes                              | 13 (2.5) | 503 (97.5)   | 516   |         |
| Initial H. pylori status         |          |              |       | 0.447   |
| No                               | 21 (1.7) | 1,246 (98.3) | 1,267 |         |
| Yes                              | 35 (2.0) | 1,681 (98.0) | 1,716 |         |
| Atrophic gastritis               |          |              |       | 0.279   |
| No                               | 37 (1.7) | 2,125 (98.3) | 2,162 |         |
| Yes                              | 19 (2.3) | 802 (97.7)   | 821   |         |
| Intestinal metaplasia            |          |              |       | 0.020*  |
| No                               | 23 (1.4) | 1,657 (98.6) | 1,680 |         |
| Yes                              | 33 (2.5) | 1,270 (97.5) | 1,303 |         |
| Cancer stage                     |          |              |       | 0.588   |
| I                                | 47 (2.0) | 2,265 (98.0) | 2,312 |         |
| II                               | 6 (1.5)  | 399 (98.5)   | 405   |         |
| III                              | 3 (1.4)  | 209 (98.6)   | 212   |         |
| IV                               | 0 (0)    | 54 (100)     | 54    |         |
| p53 overexpression               |          |              |       | 0.005*  |
| No                               | 26 (1.4) | 1,891 (98.6) | 1,917 |         |
| Yes                              | 30 (2.8) | 1,036 (97.2) | 1,066 |         |

Values are presented as number (%).

\*p<0.05.
