# Supplementary material for: Gastric Cancer in Older Patients: A Retrospective Study and Literature Review
Source: PubMed Central journal article supplement — Ann Geriatr Med Res. 2022 Mar 18;26(1):33–41. doi: 10.4235/agmr.21.0144 (PMC8984166; doi:10.4235/agmr.21.0144), 2022-03-18
Supplement: agmr-21-0144-suppl4.pdf [file agmr-21-0144-suppl4.pdf]

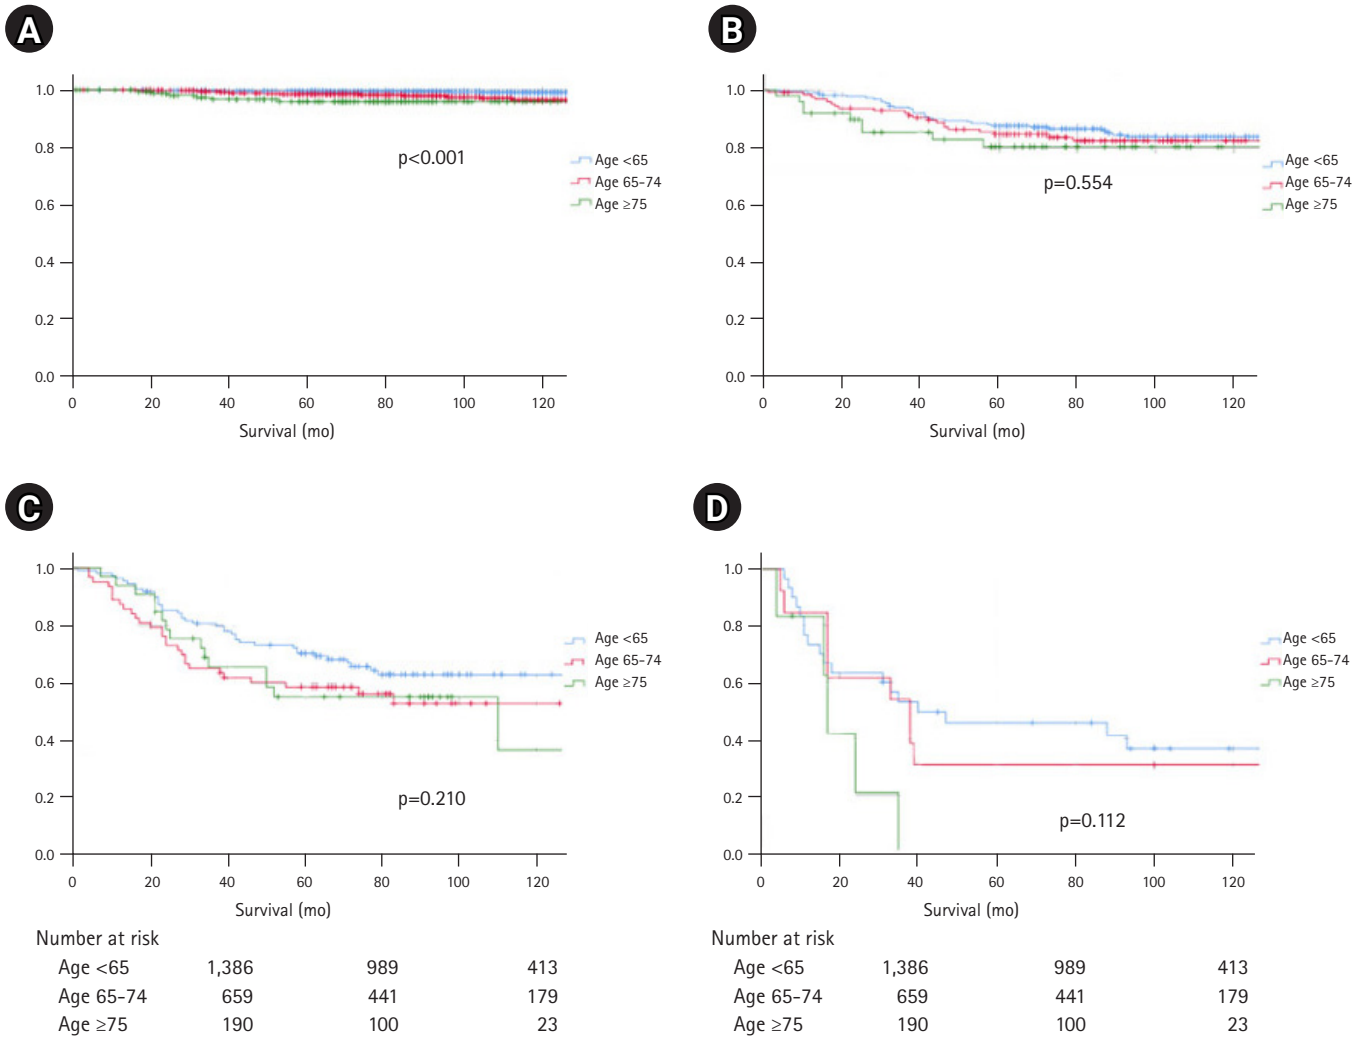

**Fig. S2.** Gastric cancer-specific survival according to cancer stage in each age group: (A) stage I, (B) stage II, (C) stage III, and (D) stage IV. The statistical significances are reduced for GC-specific survival, with a smaller difference compared to the overall survival ( $p < 0.001$ ,  $p = 0.554$ ,  $p = 0.210$ , and  $p = 0.112$  for stages I–IV, respectively).
