# Supplementary material for: Gastric Cancer in Older Patients: A Retrospective Study and Literature Review
Source: PubMed Central journal article supplement — Ann Geriatr Med Res. 2022 Mar 18;26(1):33–41. doi: 10.4235/agmr.21.0144 (PMC8984166; doi:10.4235/agmr.21.0144), 2022-03-18
Supplement: agmr-21-0144-suppl5.pdf [file agmr-21-0144-suppl5.pdf]

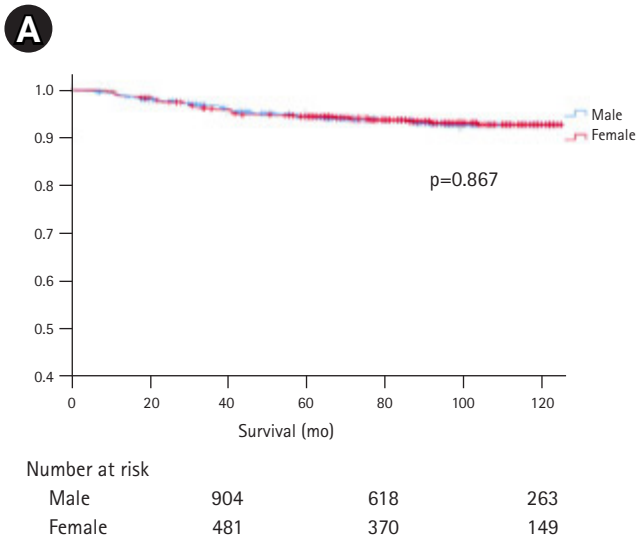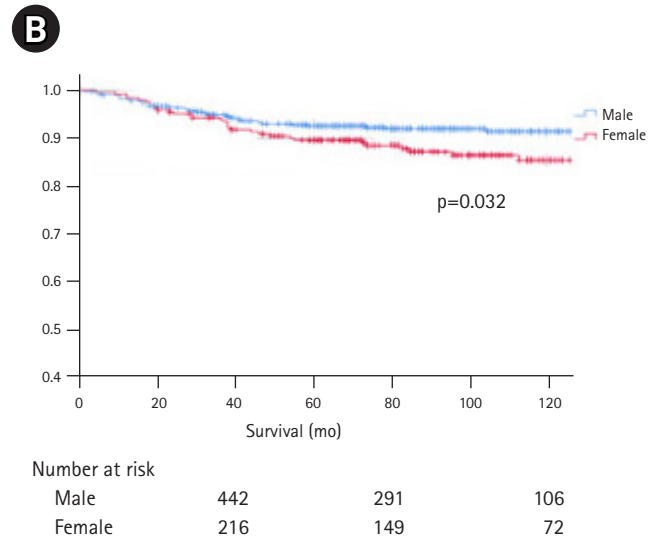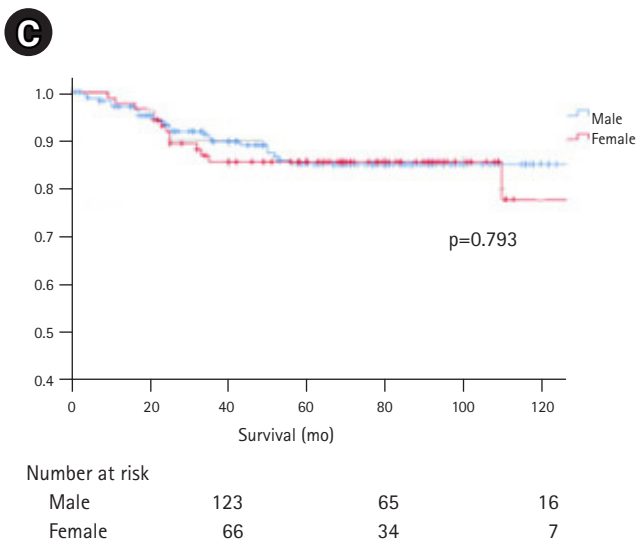

**Fig. S3.** Overall survival according to sex in each age group: (A) I (young: age <65 years), (B) II (early-old: age 60–74 years), (C) III (old: age  $\geq$ 75 years). Women show a non-significant advantage in overall survival in each age group ( $p=0.130$ ,  $p=0.060$ , and  $p=0.081$  for groups I–III, respectively).
