# Supplementary material for: Gastric Cancer in Older Patients: A Retrospective Study and Literature Review
Source: PubMed Central journal article supplement — Ann Geriatr Med Res. 2022 Mar 18;26(1):33–41. doi: 10.4235/agmr.21.0144 (PMC8984166; doi:10.4235/agmr.21.0144), 2022-03-18
Supplement: agmr-21-0144-suppl6.pdf [file agmr-21-0144-suppl6.pdf]

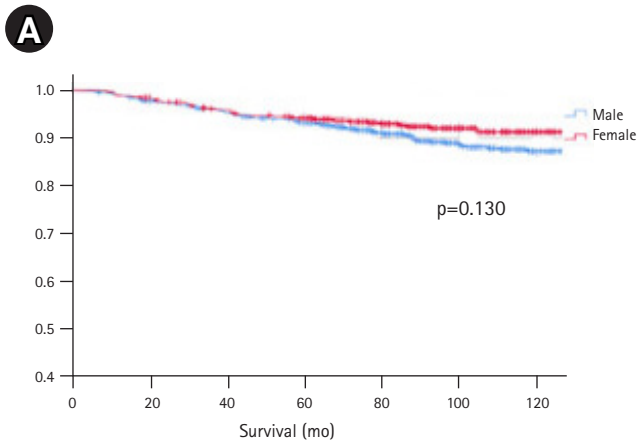

| Number at risk |     |     |     |
|----------------|-----|-----|-----|
| Male           | 904 | 618 | 263 |
| Female         | 481 | 370 | 149 |

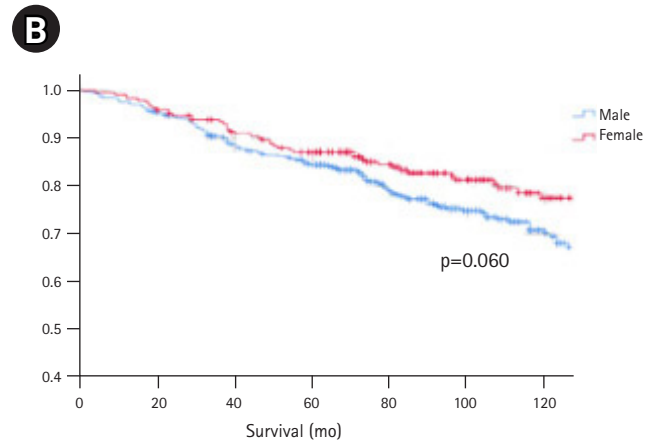

| Number at risk |     |      |     |
|----------------|-----|------|-----|
| Male           | 442 | 291  | 106 |
| Female         | 216 | 1490 | 72  |

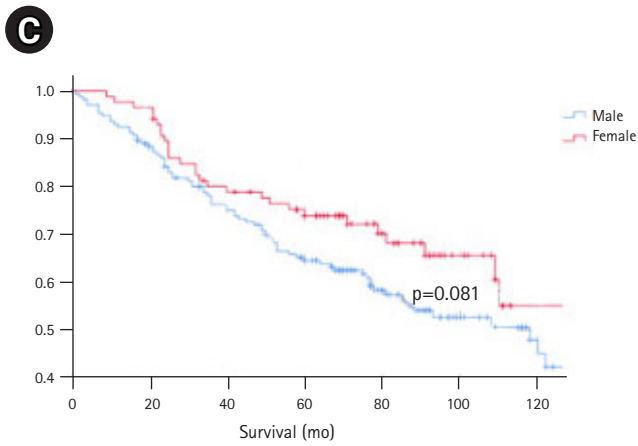

| Number at risk |     |    |    |
|----------------|-----|----|----|
| Male           | 123 | 65 | 16 |
| Female         | 66  | 34 | 7  |

**Fig. S4.** Gastric cancer-specific survival according to sex in each age group: (A) I (young: age <65 years), (B) II (early-old: age 60–74 years), (C) III (old: age ≥75 years). Men showed GC-specific survival advantages all age groups ( $p=0.867$ ,  $p=0.032$ , and  $p=0.793$  in groups I–III, respectively).
